# Supplementary material for: Introgression shapes fruit color convergence in invasive Galápagos tomato
Source: eLife. 2021 Jun 24;10:e64165. doi: 10.7554/eLife.64165 (PMC8294854; doi:10.7554/eLife.64165)
Supplement: Supplementary file 1. — (a) Full list of population collection sites and their geographic coordinates. (b) List of mainland collection sites. (c) Stacks ref_map assembly summary. (d) Stacks per-sample assembly summary. (e) Summary of sequence and genotype filters. (f) Mean Fst between focal island populations and mainland groups. (g) Demographic model estimates for PIM population MG115. Values inferred using δaδi. 95% CI values were obtained from 1000 bootstrap replicates of the site frequency spectrum (SFS). Each estimate is shown in rescaled units (rescaled by NRef for NB and NF; and by 2NRef for TB and TF). (h) Full likelihoods for NewHybrids classifications of CHS×PIM admixture on Santa Cruz. MCMC was run for 6000 steps. The most likely classification for each individual is shown in bold. (i) Full likelihoods for NewHybrids classifications of CHS×GAL admixture on Isabela. MCMC was run for 6000 steps. The most likely classification for each individual is shown in bold. (j) NewHybrids MCMC summary. Only the most likely genotype category classifications are shown. Refer to (e) for alternative class probabilities. (k) Likelihoods for different Treemix runs. (l) Summary of inferred introgression blocks for population MG114 (polymorphic). Shaded groups indicate blocks that are likely the same age/the result of the same hybridization event based on break points. (m) Summary of inferred introgression blocks for population MG117 (polymorphic). Shaded groups indicate blocks that are likely the same age/the result of the same hybridization event based on break points. (n) Summary of inferred introgression blocks for population MG116 (fixed, red fruited). (o) Population MG117 ancestry at carotenoid biosynthesis loci, as inferred by the hidden Markov model (HMM). The genomic location of each locus was determined based on the Solanum lycopersicum reference build SL3.0 and ITAG3.0 annotation. The association between ancestry and fruit color at CYC-B is significant based on a χ2 test of independence ( [file elife-64165-supp1.xlsx]

## Sheet: A
Table S1: Full list of population collection sites and their geographic coordinates.
Island	Population ID	Species	Elevation (m)	Sample size	Lat	Lon	Description
San Cristobal	MG105	PIM	319	8	00° 54' 28.76" S	89° 33' 20.37" W	El Progresso
	MG107	PIM	319	10	00° 53' 58.99" S	89° 33' 13.66" W	Soledad
	MG111	PIM	8	15	00° 54' 04.09" S	89° 36' 36.28" W	Puerto Baquerizo
Santa Cruz	MG113	PIM	259	10	00° 41' 05.56" S	90° 19' 38.02" W	Bellavista
	MG114	PIM	571	15	00° 36' 54.89" S	90° 22' 00.64" W	Mina Roja
	MG116	PIM/LYC	10	12	00° 44' 49.02" S	90° 18' 53.42" W	Puerto Ayora
	MG117	PIM	129	12	00° 42' 47.28" S	90° 19' 31.81" W	Thomas Berlanga
	MG118	PIMxLYC	264	4	00° 40' 17.50" S	90° 15' 46.42" W	Cascajo
	MG115	CHS	251	20	00° 33' 36.23" S	90° 19' 56.65" W	Santa Cruz Hwy
Isabela	MG120G	GAL	9	14	00° 55' 45.81" S	90° 58' 44.25" W	Laguna Manzanilla
	MG120C	CHS	9	9	00° 55' 45.81" S	90° 58' 44.25" W	Laguna Manzanilla
	MG124	GAL	12	4	00° 55' 47.27" S	90° 59' 12.43" W	Road to Santa Tomás
	MG127	GAL	16	2	00° 55' 23.01" S	90° 59' 20.93" W	Road to Santa Tomás
	MG122	LYC	6	3	00° 57' 15.21" S	90° 58' 08.41" W	Puerto Villamil
	MG125	LYC	138	10	00° 52' 37.26" S	91° 00' 23.73" W	Puerto Villamil
	MG126	LYC	332	5	00° 51' 00.49" S	91° 01' 28.39" W	Santa Tomás
	MG128	PIM	7	1	00° 57' 11.17" S	90° 57' 48.62" W	Puerto Villamil

## Sheet: B
Table S2: List of mainland collection sites
Accession	Longitude	Latitude
LA0121	-78.9956	-8.18444
LA0122	-78.72	-8.01
LA0373	-78.2183	-9.93694
LA0375	-78.21	-9.94
LA0418	-79.9333	-1.86667
LA 0420	-79.65	-1.06
LA 0442	-78.2592	-9.48167
LA 0443	-79.4833	-1.1
LA 0753	-79.0333	-8.11667
LA 0722	-76.8833	-12.2667
LA 1248	-79.35	-3.98333
LA 1256	-79.6167	-2.66667
LA 1280	-76.7167	-12.0333
LA 1301	-75.9167	-13.7333
LA 1381	-79.9667	-5.56667
LA 1416	-79.3333	-0.266667
LA 1428	-80.2167	-0.816667
LA 1469	-79.79	-5.86
LA 1470	-79.7333	-6.06667
LA 1472	-76.25	-13.3167
LA 1478	-80.0833	-5.21667
LA 1520	-77.1189	-11.0453
LA 1547	-77.9333	0.58333
LA 1561	-77.4167	-11.1
LA 1562	-76.8167	-12.1333
LA 1572	-76.7833	-11.9667
LA 1576	-76.8667	-12.1667
LA 1579	-79.87	-6.59
LA 1584	-79.79	-6.37
LA 1586	-78.73	-8.36
LA 1589	-78.74	-8.39
LA 1598	-78.19	-9.93
LA 1600	-78.04	-10.28
LA 1601	-77.68	-10.67
LA 1602	-76.9833	-11.7833
LA 1603	-77	-11.5333
LA 1604	-77.0833	-11.4833
LA 1605	-76.4167	-13.0833
LA 1611	-76.6167	-12.6
LA 1614	-77.3667	-11.1167
LA 1615	-80.6333	-5.23333
LA 1635	-75.0667	-14.6333
LA 1636	-76.0833	-13.45
LA 1637	-75.8333	-13.3667
LA 1651	-76.9461	-12.0853
LA 1659	-77.8586	-9.54667
LA 1660	-77.9667	-9.53333
LA 1661	-76.5	-12.7667
LA 1670	-70.5167	-17.8333
LA 1683	-81.11	-4.87
LA 1684	-80.15	-5.1
LA 1685	-80.6975	-4.88667
LA 1686	-80.62	-5.07
LA 1687	-80.62	-5.07
LA 1688	-80.375	-4.88333
LA 1689	-80.6175	-5.17639
LA 1690	-80.6175	-5.17639
LA 1697	-76.9833	-12.05
LA 1728	-75.95	-13.4
LA 1729	-75.6406	-13.2969
LA 1921	-75.1272	-14.3119
LA 1923	-75.2833	-14.6667
LA 1924	-75.2142	-14.6289
LA 1933	-74.4458	-15.4564
LA 1936	-74.0325	-15.8336
LA 1950	-73.2581	-16.3886
LA 1987	-78.83	-8.43
LA 2069	-79.6497	-4.05056
LA 2093	-79.8881	-3.62806
LA 2102	-79.4675	-4.40167
LA 2181	-78.7831	-5.77583
LA 2186	-78.1667	-5.89167
LA 2401	-78.2278	-9.50833
LA 2412	-76.7167	-12.4833
PI 251318	-79.9642	-5.26083
PI 251319	-79.4833	-1.1
PI 251320	-79.4833	-1.1
PI 251321	-80.2667	-2.33333
LA 2544	-79.3333	-7.3
LA 2576	-77.8917	-9.55
LA 2578	-77.925	-9.525
LA 2649	-80.1667	-5.575
LA 2725	-75.8694	-13.7183
LA 2832	-75.1333	-14.4667
LA 2839	-78.0667	-5.925
LA 2852	-80.4833	-0.83333
LA 2854	-80.5833	-1.35
LA 2857	-90.9667	-0.95
LA 2915	-79.7453	-5.98472
LA 2933	-80.5625	-1.44167
LA 2983	-76.7628	-12.5319
LA 3123	-90.3831	-0.62333
PI 365909	-79.15	-0.25
PI 365910	-79.85	0.86667
PI 365911	-79.9667	-3.45833
PI 365912	-79.36	-3.99
PI 365914	-79.4667	-1.58333
PI 365915	-79.5333	-1.55
PI 365916	-79.5167	-1.81667
PI 365917	-79.63	-2.25
PI 365918	-79.8167	-2.06667
PI 365958	-74.95	-14.8333
PI 365960	-78.3294	-9.46028
PI 365961	-78.6806	-8.53639
PI 365962	-78.8881	-8.08611
PI 365964	-78.35	-9.18333
PI 365965	-78.15	-9.04167
PI 365966	-77.9	-9.55833
PI 379021	-78.6667	-7.98333
PI 379023	-76.65	-11.8583
PI 379024	-76.6539	-11.8894
PI 379025	-75.1583	-14.6833
PI 379026	-80.0506	-5.2525
PI 379059	-80.1	-1.48333
PI 390519	-79.9833	-3.55
PI 390688	-77.633	-10.333
PI 390689	-77.733	-10.5
PI 390690	-77.5	-1.1
PI 390691	-77.766	-10.633
PI 390695	-79.6166	-7
PI 390696	-79.6166	-7
PI 390699	-79.9	-6.68
PI 390700	-79.7	-6.1666
PI 390701	-79.9167	-5.6
PI 390705	-80.25	-5
PI 390706	-80.75	-5.5
PI 390707	-80.8167	-5.5333
PI 390716	-81.0667	-4.88333
PI 390718	-79.9667	-5.26667
PI 390721	-79.7167	-5.41667
PI 390722	-80.75	-4.85
PI 390728	-80.5167	-3.61667
PI 390748	-80.4167	-3.55
PI 407533	-76.71	-11.95
PI 407534	-76.8333	-11.9833
PI 407535	-76.7667	-12.0833
PI 407537	-79.87	-6.59
PI 407538	-79.89	-6.6
PI 407544	-79	-8.10833
PI 407550	-78.26	-9.49
PI 407551	-78.47	-9.27
PI 407552	-78.5667	-8.925
PI 407553	-78.34	-9.47
PI 407554	-78.1264	-10.0672
PI 503517	-80.1833	-5.16667
PI 503519	-79.9833	-5.175
PI 503521	-80.5833	-4.75
PI 503522	-80.825	-4.90833
PI 503523	-80.625	-5.21667
PI 503524	-80.7	-3.8

## Sheet: C
Table S3: Stacks ref_map assembly summary
Statistic	Value
Bam records	444288642
Primary alignments retained	688775808
Records per sample	2,128,095 (17,586-13,836,425)
Assembled/genotyped loci	269892
Effective per-sample coverage	61.4x (sd = 35.0x)
Mean sites per locus	200.3

## Sheet: D
Table S4: Stacks per-sample assembly summary
Sample	Bam records	Fraction kept	# Loci	Mean coverage
0121-101	860527	0.974	17034	33
0122-101	1630820	0.972	25079	48.589
0373-102	3329913	0.972	23171	103.581
0375-101	2126539	0.966	32746	54.023
0418-101	2143602	0.978	32138	55.606
0420-101	1719200	0.979	29998	46.226
0442-101	4607456	0.975	46057	102.695
0443-101	2497478	0.973	35378	61.342
0753-101	1107015	0.97	24562	32.976
0772-101	2065633	0.972	27580	57.748
1248-101	2745125	0.981	30936	73.403
1256-101	3632845	0.978	35536	90.728
1280-101	3120897	0.977	30504	83.85
1301-101	2155029	0.978	31797	56.615
1316-1	2454676	0.938	24096	81.476
1316-6	2622282	0.939	26819	82.11
1381-101	2114032	0.974	33684	53.253
1416-101	313218	0.98	13820	13.808
1428-101	2700077	0.982	35638	68.555
1469-101	1457202	0.973	29690	38.898
1470-101	3475525	0.975	35756	86.178
1472-101	12103090	0.971	45961	291.096
1478-101	989959	0.978	19611	34.414
1520-101	4548266	0.976	29953	125.193
1547-101	874210	0.981	23120	27.471
1561-101	2172059	0.978	27342	61.321
1562-101	2288002	0.976	27199	64.904
1572-101	4330309	0.978	35422	110.974
1576-101	4227007	0.968	38571	106.326
1579-101	2739722	0.974	30155	73.004
1584-101	3938382	0.973	37777	95.768
1586-101	3544559	0.972	37577	85.758
1589-12	823915	0.972	17903	30.026
1598-101	4697846	0.977	33154	120.776
1600-101	2096174	0.972	30537	56.59
1601-101	301039	0.963	11510	15.188
1602-101	2736356	0.972	35178	67.97
1603-101	5257707	0.977	37743	130.705
1604-101	2492691	0.946	28257	67.72
1605-101	3183592	0.98	37344	76.445
1611-101	2652137	0.972	30520	72.3
1614-101	2035135	0.978	26826	57.963
1615-101	2245827	0.979	28566	63.405
1635-101	5004334	0.968	41560	119.504
1636-101	1900561	0.976	30965	49.755
1637-101	1664781	0.978	25995	49.517
1651-101	266205	0.98	14669	11.852
1659-101	5447399	0.979	41153	129.37
1660-101	1923801	0.968	26594	56.287
1661-101	2289988	0.979	31529	60.589
1670-101	3133778	0.978	31472	83.181
1683-101	3318632	0.969	35756	81.26
1684-101	3191539	0.975	22414	105.04
1685-101	2731893	0.977	31859	71.467
1686-101	3440511	0.977	35442	85.595
1687-101	4310773	0.979	38098	103.703
1688-101	4800347	0.978	40430	114.266
1689-101	1127857	0.98	21617	36.639
1690-101	2555961	0.976	31373	69.644
1697-101	5430669	0.978	41428	128.326
1728-101	5326058	0.961	21262	186.408
1729-101	5544196	0.98	43872	129.781
1777-27	1692290	0.93	19922	62.233
1921-101	2499661	0.971	31127	67.084
1923-101	3376990	0.974	33440	86.66
1924-101	3200102	0.977	33993	82.095
1933-101	2357305	0.978	32867	61.884
1936-101	13836425	0.975	41433	332.854
1950-101	4561743	0.975	36384	113.567
1987-101	290857	0.968	12644	13.926
2069-101	3869190	0.978	36932	93.812
2093-101	2700416	0.98	37549	66.224
2102-101	2219077	0.974	34680	55.023
2172-15	980024	0.938	19945	34.482
2172-2	2497911	0.943	28183	75.962
2181-101	4189761	0.974	39622	100.017
2186-101	2449823	0.979	32297	64.939
2401-101	2238459	0.972	34308	55.845
2412-101	555326	0.961	16565	21.261
251318-101	2181450	0.977	29419	59.609
251319-101	977057	0.977	23040	30.38
251320-101	3661717	0.974	40335	85.945
251321-101	2735553	0.978	27966	77.639
2544-101	4029122	0.977	36496	100.314
2576-101	2840786	0.971	32821	73.02
2578-101	1676259	0.974	28117	46.642
2649-101	420490	0.964	14742	17.394
2650-101	229441	0.981	9556	13.814
2725-101	4544274	0.978	37961	112.358
2832-101	3536608	0.973	38029	86.212
2839-101	4515964	0.969	36132	116.373
2852-101	1051515	0.973	22886	32.64
2854-101	1761127	0.979	26764	50.474
2857-101	2620451	0.98	37788	63.593
2915-101	3738875	0.976	34888	95.234
2933-101	73476	0.954	6306	6.1
2983-101	4009330	0.978	34339	104.643
3123-101	1426303	0.971	29396	37.907
365909-101	1356728	0.98	27700	37.888
365910-101	3475812	0.982	35251	87.426
365911-101	17586	0.94	3173	2.728
365912-101	2690411	0.98	28908	75.043
365914-101	2912501	0.978	39856	68.799
365915-101	2507336	0.98	36527	61.872
365916-101	1756143	0.978	31283	46.149
365917-101	1106543	0.98	22047	35.6
365918-101	3367378	0.979	42736	76.855
365958-101	4835275	0.975	37191	118.94
365960-101	2534529	0.977	30820	67.633
365961-101	2291525	0.978	29046	64.786
365962-101	3773949	0.975	36760	92.937
365964-101	3201558	0.976	36215	79.441
365965-101	3722221	0.978	28182	104.862
365966-101	1822739	0.979	25301	55.208
3778-5	2004880	0.925	21279	74.21
3778-9	1646601	0.927	20385	63.181
379021-101	1778550	0.977	28344	49.177
379023-101	2888964	0.977	34130	73.825
379024-101	1718608	0.973	25672	50.495
379025-101	4022951	0.978	34063	103.335
379026-101	4340700	0.98	38470	104.786
379059-101	2421589	0.981	31746	64.709
390519-101	1666679	0.977	29865	44.378
390688-101	1752668	0.978	30987	46.157
390689-101	4512953	0.977	38270	110.085
390690-101	2646066	0.976	10851	150.443
390691-101	3381952	0.976	36319	83.565
390695-101	423532	0.976	14109	18.452
390696-101	3692047	0.976	36228	90.892
390699-101	2130632	0.975	31947	55.986
390700-101	3748237	0.975	34294	95.713
390701-101	2286853	0.976	35498	56.239
390705-101	2541073	0.976	38360	60.362
390706-101	5667961	0.979	42438	132.915
390707-101	2150065	0.977	32006	55.456
390716-101	649115	0.978	23213	20.37
390718-101	2263338	0.976	34473	55.94
390721-101	1990569	0.978	32194	52.027
390722-101	2426132	0.978	30980	64.961
390728-101	4222460	0.978	36856	105.316
390748-102	1619440	0.978	28684	44.355
407533-101	1313574	0.973	29425	36.275
407534-101	3650109	0.976	36673	88.856
407535-103	2199289	0.976	33381	56.649
407537-101	3609456	0.975	32089	94.558
407538-101	2500804	0.972	33091	64.03
407544-101	1986374	0.972	31221	51.989
407550-101	4712208	0.978	36252	118.624
407551-101	2952304	0.969	33357	75.274
407552-101	2026851	0.978	25959	59.894
407553-101	3324274	0.977	33136	86.48
407554-101	1600623	0.974	30346	42.51
4117A-103	2270802	0.925	21943	82.778
4117A-31	2189807	0.927	24388	73.222
503517-101	41587	0.977	6038	3.769
503519-101	2150172	0.976	30221	57.298
503521-101	6484748	0.979	45894	147.141
503522-101	2816838	0.975	35615	70.381
503523-101	2419634	0.973	31376	63.588
503524-101	1960823	0.982	30638	53.171
MG101-1	725195	0.928	18335	25.537
MG103-1	977295	0.96	18436	35.374
MG103-2	872069	0.941	19843	29.093
MG104-1	1057938	0.958	11116	58.649
MG105-1R	802728	0.958	20614	25.944
MG105-2	1251346	0.955	22039	38.886
MG105-3	913195	0.957	14281	37.933
MG105-4	419832	0.941	14741	16.625
MG105-5	1097887	0.95	18938	37.605
MG105-6	620727	0.928	15240	24.131
MG105-7	1065864	0.94	22244	32.856
MG105-8	1669040	0.946	21116	53.846
MG106-1	1048647	0.935	21094	33.885
MG106-2	2067945	0.951	24944	61.98
MG106-3	1508324	0.919	25277	42.628
MG107-1	1020866	0.949	20784	33.154
MG107-10	1371695	0.95	23053	41.631
MG107-2	1013620	0.954	19659	34.407
MG107-3	1570291	0.943	23608	46.753
MG107-4	1191986	0.947	22672	36.376
MG107-5	1233479	0.949	23085	37.537
MG107-6	1400747	0.951	24138	41.631
MG107-7	1509667	0.943	25277	42.924
MG107-8	817534	0.944	22834	24.648
MG107-9	1247038	0.948	23293	37.524
MG109-1	487019	0.934	16752	17.768
MG109-2	1366389	0.922	23161	40.268
MG110-1	1495047	0.944	19625	50.782
MG111-1	1184637	0.951	22352	36.789
MG111-10	1062784	0.923	19524	35.003
MG111-11	971504	0.938	18317	34.064
MG111-12	941272	0.932	16856	34.805
MG111-13	1611403	0.9	10274	95.883
MG111-14	652155	0.932	13871	27.868
MG111-15	1149410	0.921	20600	37.079
MG111-2	1319828	0.956	21336	42.519
MG111-3	650475	0.938	19195	21.732
MG111-4	1467335	0.951	24297	43.762
MG111-5	975986	0.939	18848	33.374
MG111-6	840759	0.934	17313	30.492
MG111-7	1203553	0.948	18638	42.454
MG111-8	1160326	0.941	17337	42.655
MG111-9	1297324	0.929	20208	42.701
MG113-1	571968	0.772	8039	33.615
MG113-10	1244608	0.938	24388	35.874
MG113-2	653093	0.944	15521	25.727
MG113-3R	300687	0.943	13535	12.897
MG113-4R	843535	0.937	18422	28.902
MG113-5	575110	0.935	16909	20.961
MG113-6R	2593997	0.944	25708	74.595
MG113-7	850539	0.943	18776	28.988
MG113-8	2269982	0.952	23278	68.572
MG113-9	1278430	0.935	22422	38.587
MG114-1	1611257	0.943	25513	45.471
MG114-10	1796885	0.95	25910	51.116
MG114-11R	1613402	0.944	24758	46.904
MG114-12	1507046	0.935	21076	47.935
MG114-13	1342628	0.94	19642	44.421
MG114-14	1317485	0.947	19916	43.755
MG114-15	1591814	0.944	21411	50.567
MG114-2	1300896	0.944	12767	60.66
MG114-3	1723271	0.944	11520	89.564
MG114-4	1603043	0.943	22800	48.25
MG114-5	1228445	0.936	20553	39.003
MG114-6	762486	0.937	17455	27.083
MG114-7	1141877	0.942	16898	41.686
MG114-8	1205965	0.947	24169	35.389
MG114-9	1141136	0.955	15419	45.178
MG115-1	1477117	0.938	23093	44.483
MG115-10	973572	0.944	20389	32.138
MG115-11	1231265	0.941	24113	36.387
MG115-12	1567784	0.942	24255	46.785
MG115-13	2586243	0.963	21691	85.989
MG115-14	1941036	0.957	27676	53.886
MG115-15	2145739	0.961	30369	57.138
MG115-16	2070350	0.961	28224	57.151
MG115-17R	1726535	0.952	24777	50.676
MG115-18	1979915	0.963	24131	60.335
MG115-19	2262119	0.97	17555	85.434
MG115-2	1106841	0.926	24626	31.365
MG115-20	2150328	0.961	28516	58.657
MG115-3	1533423	0.938	24524	44.596
MG115-4	1800051	0.948	23123	54.73
MG115-5	1345188	0.932	23577	39.921
MG115-6	922730	0.931	18308	32.439
MG115-7	1383340	0.938	23713	40.832
MG115-8	685980	0.942	17987	24.383
MG115-9	856138	0.943	22300	26.311
MG116-1	2620413	0.955	27302	73.4
MG116-10	1474196	0.959	23858	44.53
MG116-11	1157341	0.959	24159	34.504
MG116-12	1533917	0.964	24423	46.12
MG116-2	1364474	0.945	23098	40.972
MG116-3	1327137	0.954	20642	44.534
MG116-4	1621290	0.941	23231	48.327
MG116-5	1527120	0.967	24202	45.724
MG116-6	1905794	0.96	27432	52.444
MG116-7	2153685	0.968	23252	67.593
MG116-8	1782314	0.965	24634	52.398
MG116-9	790971	0.957	18616	27.702
MG117-1	2809514	0.961	28967	77.132
MG117-10	1502902	0.958	26639	42.204
MG117-11	1923532	0.95	28226	52.276
MG117-12	1211097	0.959	22834	37.889
MG117-2	3476301	0.96	30638	92.095
MG117-3	1632177	0.964	24771	48.427
MG117-4	2307685	0.956	26581	65.874
MG117-5	1610157	0.954	24949	46.59
MG117-6	1206813	0.951	21453	38.663
MG117-7	1801874	0.946	26204	51.04
MG117-8	1715525	0.953	24281	51.474
MG117-9	2179544	0.958	26274	62.452
MG118-1	1103683	0.941	19515	37.384
MG118-2	1269249	0.955	22429	40.491
MG118-3	1445480	0.956	21846	46.781
MG118-4	1301649	0.954	23723	39.913
MG119-1	1354403	0.945	23381	41.215
MG120-1	1317924	0.953	22436	41.413
MG120-10	1063381	0.952	17837	38.961
MG120-11-1	1041049	0.943	18670	36.437
MG120-11-2	1009798	0.97	20749	33.949
MG120-13	982881	0.959	20783	31.933
MG120-15	1270578	0.964	23248	39.201
MG120-17	2247542	0.967	23367	70.732
MG120-18	2030229	0.967	24802	61.665
MG120-19	2262015	0.973	13697	106.883
MG120-2	886664	0.944	19009	30.448
MG120-20	2718318	0.968	18435	104.637
MG120-21	2427974	0.96	19247	85.343
MG120-22	1318297	0.923	16698	49.39
MG120-23	1374128	0.97	12017	72.572
MG120-24	2036867	0.966	19389	72.398
MG120-25R	1643420	0.968	21039	54.345
MG120-26	1708398	0.97	19285	60.138
MG120-27	1396758	0.959	19094	49.861
MG120-28	2766644	0.967	21790	91.26
MG120-29	2761259	0.965	24255	85.876
MG120-3	825272	0.903	18024	28.046
MG120-30	2487753	0.956	21644	80.888
MG120-31	2521148	0.952	15268	111.736
MG120-32	3240975	0.966	25778	95.885
MG120-33	2757052	0.964	25710	81.585
MG120-34	1868699	0.963	24014	57.217
MG120-35	1630391	0.961	12558	85.032
MG120-4	1228342	0.949	18728	43.217
MG120-5	935242	0.946	13198	42.036
MG120-6	1011413	0.933	18383	35.368
MG120-7	1012083	0.941	18590	35.337
MG120-8	1593234	0.948	20843	53.045
MG120-9	1572342	0.948	19438	54.613
MG121-1	1945828	0.973	19266	69.698
MG122-1	2686292	0.976	12638	144.7
MG122-2	4586924	0.978	23482	150.272
MG124-1R	1017508	0.968	17320	37.994
MG124-2	955443	0.954	20026	31.856
MG124-3R	2370949	0.969	24067	72.399
MG124-4R	907607	0.971	19503	31.376
MG125-1	2535112	0.964	24049	76.8
MG125-10	2150726	0.964	27549	60.85
MG125-2	3231953	0.973	25269	98.059
MG125-3	3279297	0.974	23299	105.228
MG125-4	4015968	0.958	25993	118.148
MG125-5	1402070	0.957	23665	42.37
MG125-6	1569825	0.958	25790	45.052
MG125-7	2363601	0.963	27347	66.782
MG125-8	2594420	0.962	28513	72.106
MG125-9	1980450	0.961	26345	57.123
MG126-1	1505836	0.963	25147	45.062
MG126-2	1631100	0.973	14470	71.207
MG126-3	1551656	0.966	19077	54.742
MG126-4	1382566	0.958	23114	43.06
MG126-5	1190730	0.93	24328	34.349
MG127-1	707240	0.963	19487	24.347
MG127-2	1420116	0.965	23195	44.543
MG128-1	1454426	0.965	24074	44.481

## Sheet: E
Table S5: Summary of sequence and genotype filters
Filter #	Filter applied	Script calls	# of SNPs	Used for
Initial Stacks calls	Internal Stacks quality filters	Stacks ref_map		-
1	Remove stacks present in less than 80% of samples	Stacks populations -R 0.8	49580	Diversity and divergence*†; introgression HMM*†; Treemix†
2	Remove sites supported by less than 8 reads	vcftools –minDP –max-missing-count	11297	-
3	Remove individuals with > 60% missing data	vcftools –remove-indv	11297	D-stats
4	Remove sites in high LD (r2 > 0.7)	bcftools +prune	5767	fastStructure; NewHybrids; RAxML; δaδi
* Performed on Stacks assembled haplotypes, not SNPs.
† Individuals with missing data also removed

## Sheet: F
Table S6: Mean Fst between focal island populations and mainland groups.
	Peru	Ecu
MG105	0.351069	0.193202
MG106	0.335434	0.25599
MG107	0.338202	0.172407
MG111	0.357811	0.21111
MG113	0.329355	0.169055
MG114	0.348367	0.188794
MG115	0.362342	0.298977
MG117	0.342618	0.182225
MG120_G	0.387008	0.347495
MG120_C	0.412477	0.370005
MG120_GC	0.380804	0.329513
MG125	0.308738	0.130834
MG126	0.33319	0.190727

## Sheet: G
Table S7: Demographic model estimates for PIM population MG115
Values inferred using δaδi. 95% CI values were obtained from 1,000 bootstrap replicates of the SFS. Each estimate is shown in rescaled units (rescaled by NRef for NB and NF; and by 2NRef for TB and TF).
Parameter	Optimum	Bootstrap	95% CI
		Median
NB	115.37	314.33	4.82 - 1444.46
NF	335.06	991.97	345.55 – 6644.64
TB	670.37	928.21	109.74 – 8509.09
TF	98.26	917.73	35.77 – 16116.06
F	0.55	0.0134	3.48x10-9 – 0.53

## Sheet: H
Table S8: Full likelihoods for NewHybrids classifications of CHSxPIM admixture on Santa Cruz.
MCMC was run for 6,000 steps. The most likely classification for each individual is shown in bold.
Individual	Pop	CHS	PIM	F1	F2	BC_CHS	BC_PIM
MG113-10	PIM	1	0	0	0	0	0
MG113-2	PIM	1	0	0	0	0	0
MG113-3R	PIM	1	0	0	0	0	0
MG113-4R	PIM	1	0	0	0	0	0
MG113-5	PIM	1	0	0	0	0	0
MG113-6R	PIM	1	0	0	0	0	0
MG113-7	PIM	1	0	0	0	0	0
MG113-8	PIM	1	0	0	0	0	0
MG113-9	PIM	1	0	0	0	0	0
MG115-10	CHS	0	1	0	0	0	0
MG115-11	CHS	0	1	0	0	0	0
MG115-12	CHS	0	1	0	0	0	0
MG115-13	CHS	0	1	0	0	0	0
MG115-14	CHS	0	1	0	0	0	0
MG115-15	CHS	0	1	0	0	0	0
MG115-16	ADMX	0	1	0	0	0	0
MG115-17R	ADMX	0	1	0	0	0	0
MG115-18	CHS	0	1	0	0	0	0
MG115-19	CHS	1	0	0	0	0	0
MG115-1	CHS	0	1	0	0	0	0
MG115-20	ADMX	0	0	0	1	0	0
MG115-2	CHS	0	1	0	0	0	0
MG115-3	ADMX	0	0	0	1	0	0
MG115-4	CHS	0	1	0	0	0	0
MG115-5	ADMX	0	0	1	0	0	0
MG115-6	CHS	0	1	0	0	0	0
MG115-7	ADMX	0	0	1	0	0	0
MG115-8	CHS	0	1	0	0	0	0
MG115-9	CHS	0	1	0	0	0	0

## Sheet: I
Table S9: Full likelihoods for NewHybrids classifications of CHSxGAL admixture on Isabela.
MCMC was run for 6,000 steps. The most likely classification for each individual is shown in bold.
Individual	Pop	CHS	PIM	F1	F2	BC_CHS	BC_PIM
MG120-13	ADMX	0	0	0	1	0	0
MG120-15	ADMX	0.99983	0	0	0.00017	0	0
MG120-19	ADMX	0	0.99983	0	0.00017	0	0
MG120-23	ADMX	0	0	0	0.00017	0	0.99982
MG120-28	ADMX	0	0	0.07191	0.04213	0	0.88596
MG120-33	ADMX	0	0	0	0.99986	0	0.00014
MG120-34	ADMX	0	0	3e-05	0.99995	2e-05	0
MG120-11-2	CHS	0.99983	0	0	0.00017	0	0
MG120-17	CHS	0.99983	0	0	0.00017	0	0
MG120-18	CHS	0.99983	0	0	0.00017	0	0
MG120-20	CHS	0.99983	0	0	0.00017	0	0
MG120-22	CHS	0.99983	0	0	0.00017	0	0
MG120-24	CHS	0.01289	0	0	0.75656	0	0.23055
MG120-27	CHS	0	0	0.1954	0.00655	0	0.79804
MG120-29	CHS	0.99983	0	0	0.00017	0	0
MG120-31	CHS	0.99983	0	0	0.00017	0	0
MG120-10	PIM	0	0.99983	0	0.00017	0	0
MG120-11-1	PIM	0	0.99983	0	0.00017	0	0
MG120-21	PIM	0	0.99983	0	0.00017	0	0
MG120-25R	PIM	0	0.99983	0	0.00017	0	0
MG120-26	PIM	0	0	0	0.00843	0.99157	0
MG120-2	PIM	0	0.99983	0	0.00017	0	0
MG120-1	PIM	0	0.99983	0	0.00017	0	0
MG120-30	PIM	0	0.99983	0	0.00017	0	0
MG120-32	PIM	0	0.99983	0	0.00017	0	0
MG120-3	PIM	0	0.99983	0	0.00017	0	0
MG120-4	PIM	0	0.99983	0	0.00017	0	0
MG120-5	PIM	0	0.99983	0	0.00017	0	0
MG120-6	PIM	0	0.99983	0	0.00017	0	0
MG120-7	PIM	0	0.99983	0	0.00017	0	0
MG120-8	PIM	0	0.99983	0	0.00017	0	0
MG120-9	PIM	0	0.99983	0	0.00017	0	0

## Sheet: J
Table S10: NewHybrids MCMC summary.
Only the most likely genotype category classifications are shown. Refer to Table S5 for alternative class probabilities.
			Classification
Population A	Population B	Type	Pure	F1	F2	BC
MG115	MG113	CHS-PIM	25	2	2	0
MG120C	MG120G	CHS-GAL	24	0	4	4

[truncated: 6 more sheets: K, L, M, N, O, P]
